# Supplementary material for: Inkjet-printed unclonable quantum dot fluorescent anti-counterfeiting labels with artificial intelligence authentication
Source: PubMed Central journal article supplement (PMC6547729; doi:10.1038/s41467-019-10406-7), 2019-06-03
Supplement: 41467_2019_10406_MOESM3_ESM.pdf [file 41467_2019_10406_MOESM3_ESM.pdf]

## **Description of Additional Supplementary Files**

File Name: Supplementary Data 1

Description: The original absorption and PL spectra of coumarin.

File Name: Supplementary Data 2

Description: Quantum dots for calculating PL quantum yield of the blue quantum dots.
